# Supplementary material for: The Stroke Riskometer™ App: Validation of a data collection tool and stroke risk predictor
Source: PubMed Central journal article supplement (PMC4335600; doi:10.1111/ijs.12411), 2014-12-10

## SUPPLEMENTARY MATERIALS

Supplementary Figure 1A

(A)  
Supplementary Figure 1A

(B)

(A) Mean Predicted Stroke Risk Scores by Event Outcome  
Rotterdam Males

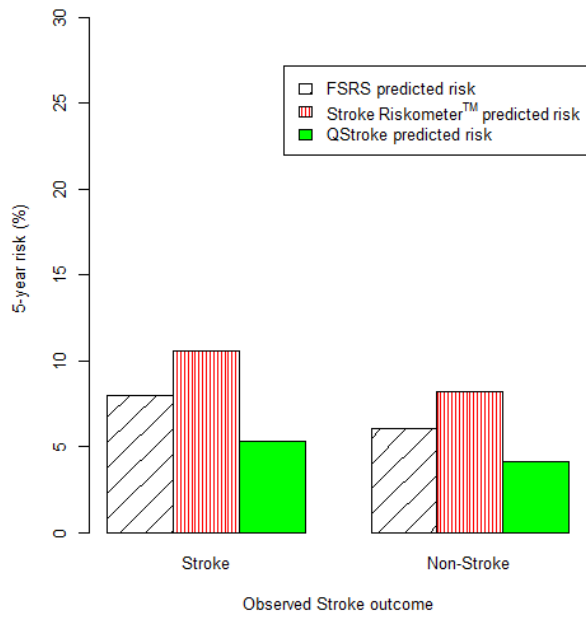

Mean Predicted Stroke Risk Scores by Event Outcome  
Rotterdam Females

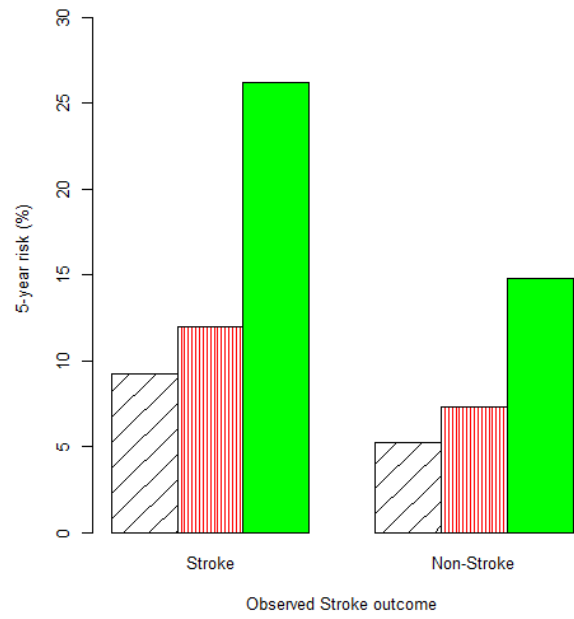

(B)

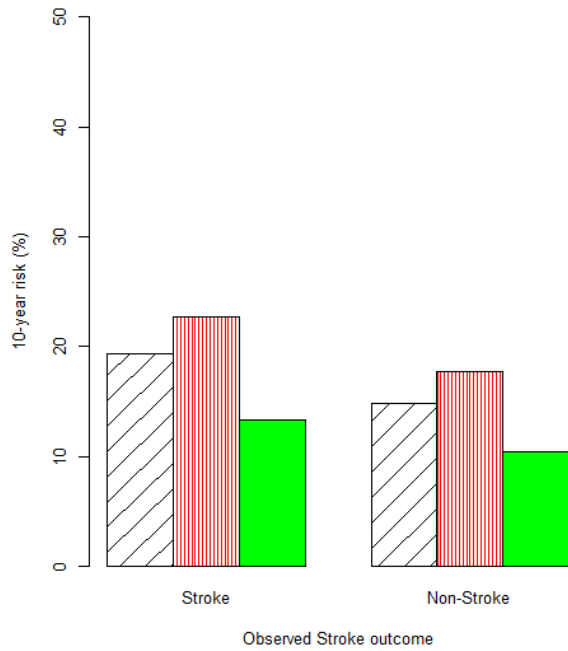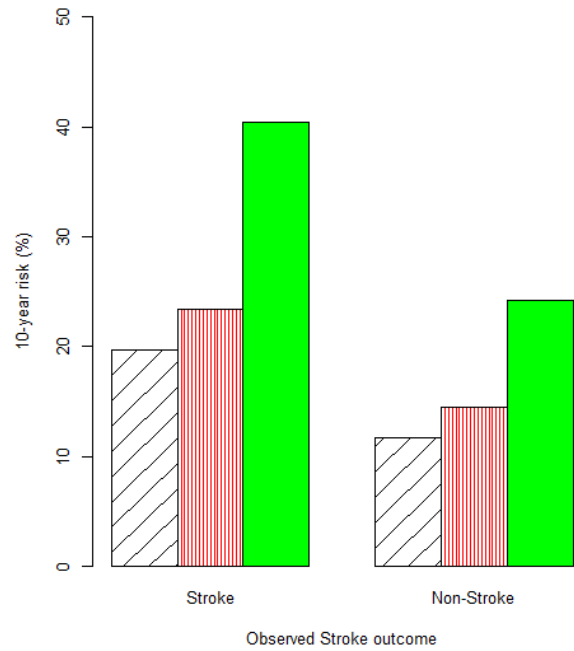

Supplementary Figure 1B

(A)

Supplementary Figure 1B

(A) Mean Predicted Stroke Risk Scores by Event Outcome Males

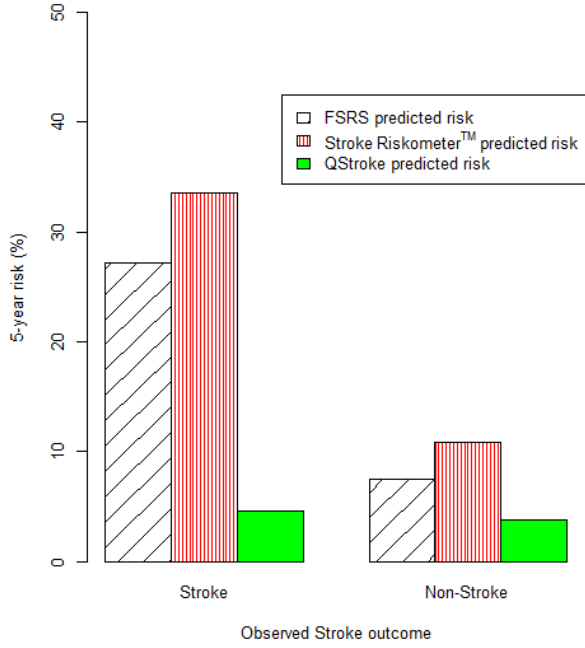

Mean Predicted Stroke Risk Scores by Event Outcome Females

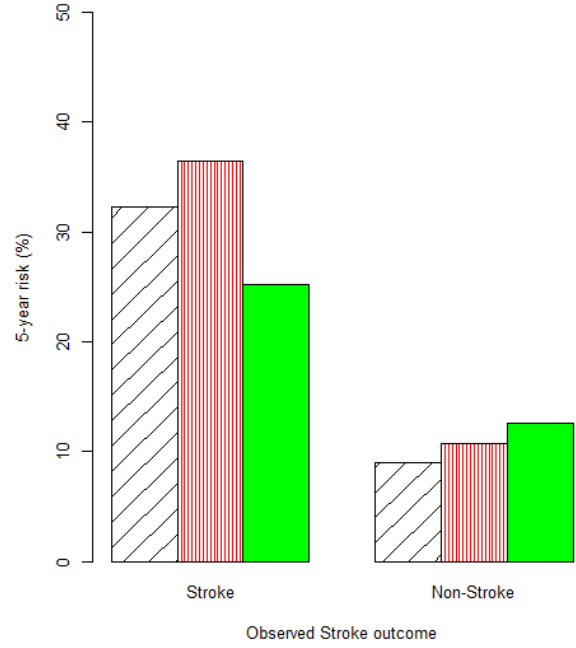

(B)

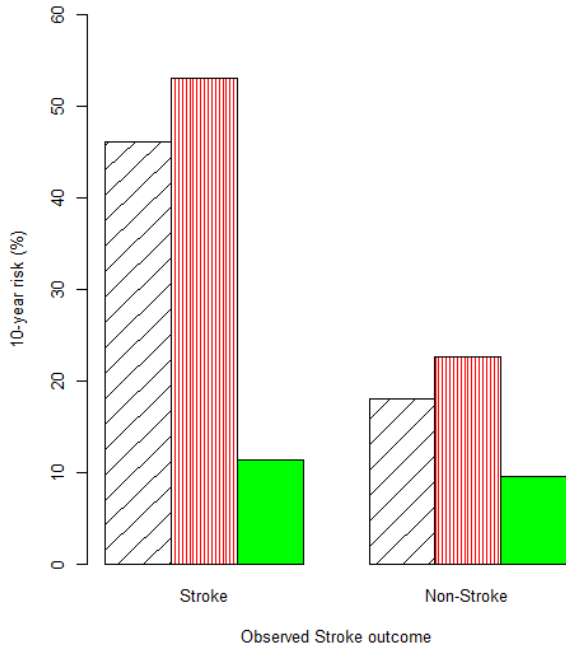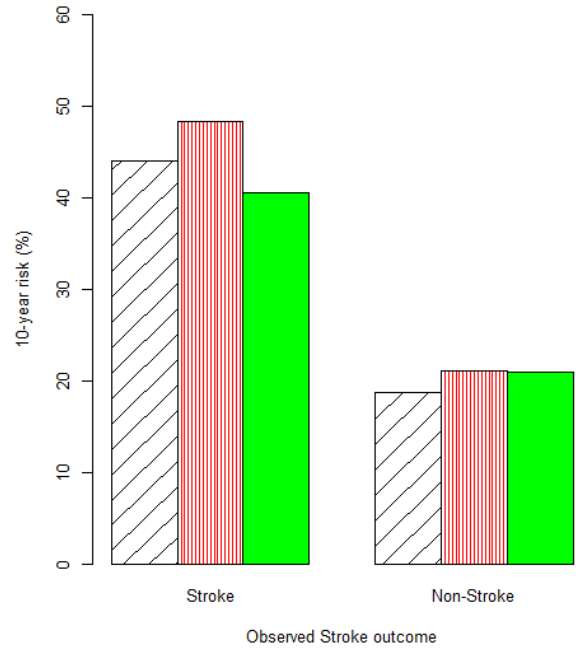

Supplementary Figure 2

(A)

Supplementary Figure 2

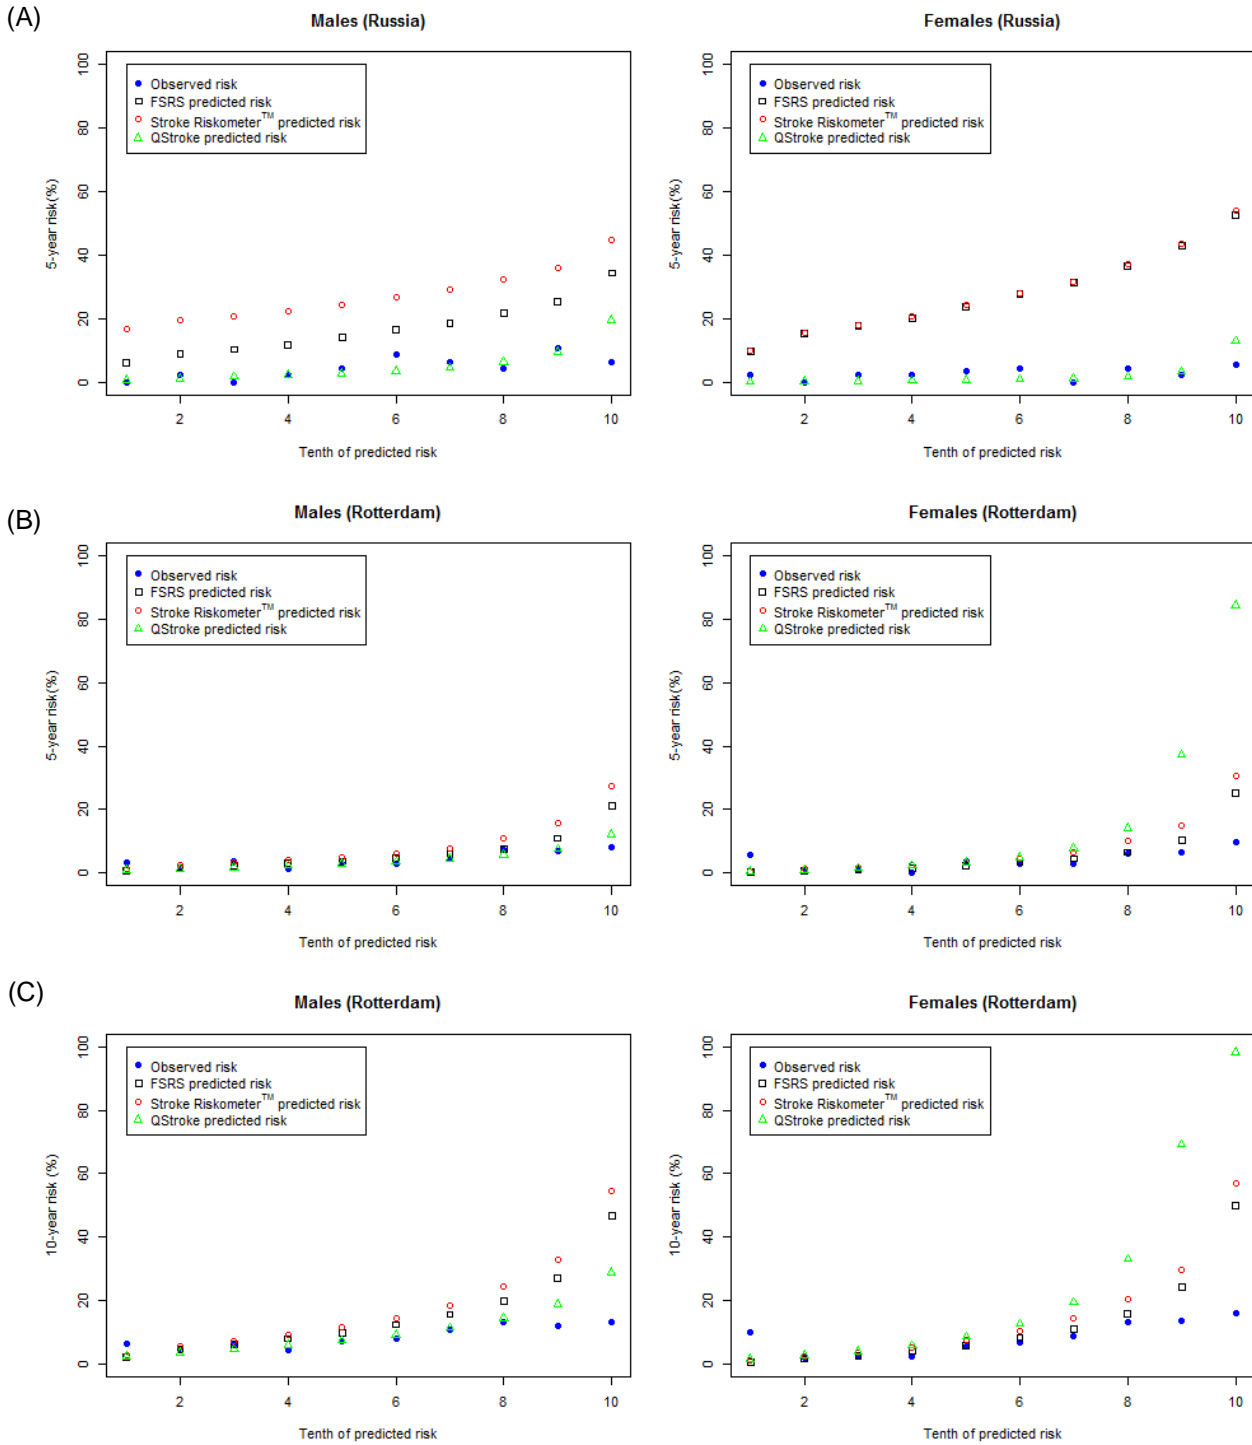

Supplement: ijs0010-0231-sd1.pdf [file ijs0010-0231-sd1.pdf]
